# Supplementary material for: Strongest π–metal orbital coupling in a porphyrin/gold cluster system
Source: Royal Society of Chemistry journal article supplement (doi:10.1039/c3sc53460j), 2014-01-01
Supplement: c3sc53460j1.pdf [file c3sc53460j1.pdf]

***Electronic Supplementary Information for***

**Strongest  $\pi$ -Metal Orbital Coupling in a Porphyrin/Gold Cluster System†**

Daisuke Tanaka,<sup>a,g</sup> Yoko Inuta,<sup>a</sup> Masanori Sakamoto,\*<sup>b,g,h</sup> Akihiro Furube,<sup>c</sup> Mitsutaka Haruta,<sup>b</sup>

Yeong-Gi So,<sup>d</sup> Koji Kimoto,<sup>e</sup> Ikutaro Hamada<sup>f</sup> and Toshiharu Teranishi\*<sup>b,g</sup>

<sup>a</sup> Graduate School of Pure and Applied Sciences, University of Tsukuba, 1-1-1 Tennodai, Tsukuba 305-8571, Japan.

<sup>b</sup> Institute for Chemical Research, Kyoto University, Gokasho, Uji 611-0011, Japan. E-mail: sakamoto@scl.kyoto-u.ac.jp; teranisi@scl.kyoto-u.ac.jp

<sup>c</sup> Research Institute of Instrumentation Frontier (RIIF), National Institute of Advanced Industrial Science and Technology (AIST), 1-1-1 Umezono, Tsukuba 305-8568, Japan.

<sup>d</sup> Department of Materials Science and Engineering, Graduate School of Engineering and Resource Science, Akita University, 1-1 Tegata Gakuen-machi 010-8502, Japan.

<sup>e</sup> Advanced Key Technologies Division, National Institute for Material Science (NIMS), 1-1 Namiki, Tsukuba 305-0044, Japan.

<sup>f</sup> International Center for Materials Nanoarchitectonics (MANA), National Institute for Material Science (NIMS), 1-1 Namiki, Tsukuba 305-0044, Japan.

<sup>g</sup> CREST, Japan Science and Technology Agency (JST), 4-1-8 Honcho, Kawaguchi 322-0012, Japan.

<sup>h</sup> PRESTO-JST, 4-1-8 Honcho, Kawaguchi 322-0012, Japan.

e-mail:

sakamoto@scl.kyoto-u.ac.jp

teranisi@scl.kyoto-u.ac.jp

## Synthesis of SC<sub>n</sub>P and SC<sub>n</sub>P–AuCs

**Materials:** All materials were purchased from commercial suppliers and used as received.

**Instruments:** <sup>1</sup>H and <sup>13</sup>C NMR spectra were recorded on a 200 MHz Varian Gemini 200 NMR spectrometer and a Bruker Avance III 600US Plus NMR system. Gel permeation chromatography high-performance liquid chromatography (GPC-HPLC) was carried out using a LC-908 (Japan Analytical Industry Co., Ltd.) with a JAIGEL-W253 column. GPC-HPLC chromatograms were recorded on a Shimadzu UV-3150. Matrix assisted laser desorption/ionization time-of-flight mass (MALDI-TOF MS) spectra were measured on a time-of-flight mass spectrometer (Applied Biosystems, Voyager-DE STR-H) operated with a N<sub>2</sub> laser (337 nm, 3 Hz, <100 μJ). Mass calibration in MALDI-TOF MS was carried out using a peptide calibration standard II (Bruker Co.). Gas chromatography mass spectrometry (GC-MS) data were recorded on a Shimadzu GCMS-QP5050. Inductively coupled plasma atomic emission spectroscopy (ICP-AES) measurements were carried out using a PerkinElmer Optima 7300DV. UV-vis-NIR absorption spectra measurements were carried out using a Hitachi U-4100. Transmission electron microscope (TEM) images were obtained using a JEOL JEM-100. High-angle annular dark field scanning transmission electron microscope (HAADF-STEM) images were obtained using a Hitachi High-Technologies HD-2300C operating at 200 kV equipped with a spherical aberration corrector. The details of the femtosecond transient absorption spectrometer have been discussed elsewhere.<sup>1,2</sup> Briefly, the light source for the femtosecond pump-probe transient absorption measurements was a regenerative amplifier system consisting of a Ti:sapphire laser (800 nm wavelength, 130 fs fwhm pulse width, 0.8 mJ/pulse intensity, 1 kHz repetition; Spectra Physics, Hurricane) combined with an optical parametric amplifier (OPAs; Quantronix, TOPAS). For a pump pulse, the output of the OPA at a wavelength of 520 or 560 nm with an intensity of about 2 μJ per pulse at a 500-Hz modulation frequency was used. For a probe pulse, the white light continuum generated by focusing the fundamental beam (800 nm) onto a sapphire plate (2

mm thick) was used. The probe beam was focused at the center of the pump beam on the sample, and the transmitted probe beam was then detected using an InGaAs photodetector after passing through a monochromator (Acton Research, SpectraPro-150). The time resolution of the measurements was about 250 fs. All measurements were performed at 295 K.

**Synthesis of porphyrin derivatives:** The synthesis procedures for SC<sub>0</sub>P and SC<sub>1</sub>P were partially modified from previous reports.<sup>3,4</sup> SC<sub>2</sub>P was synthesized as previously reported.<sup>3</sup>

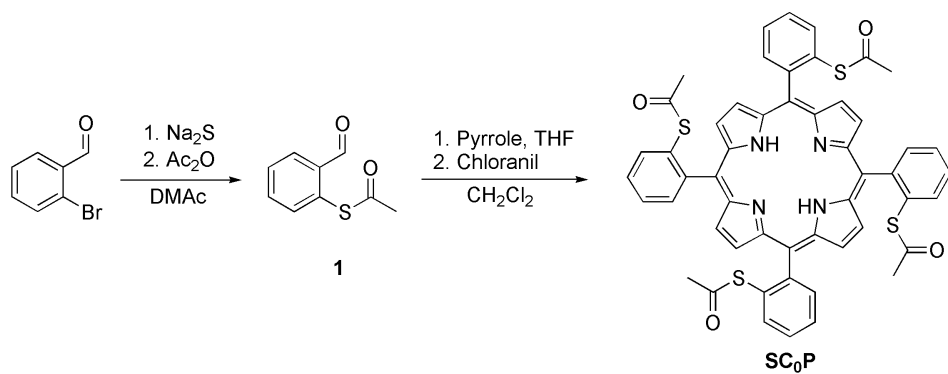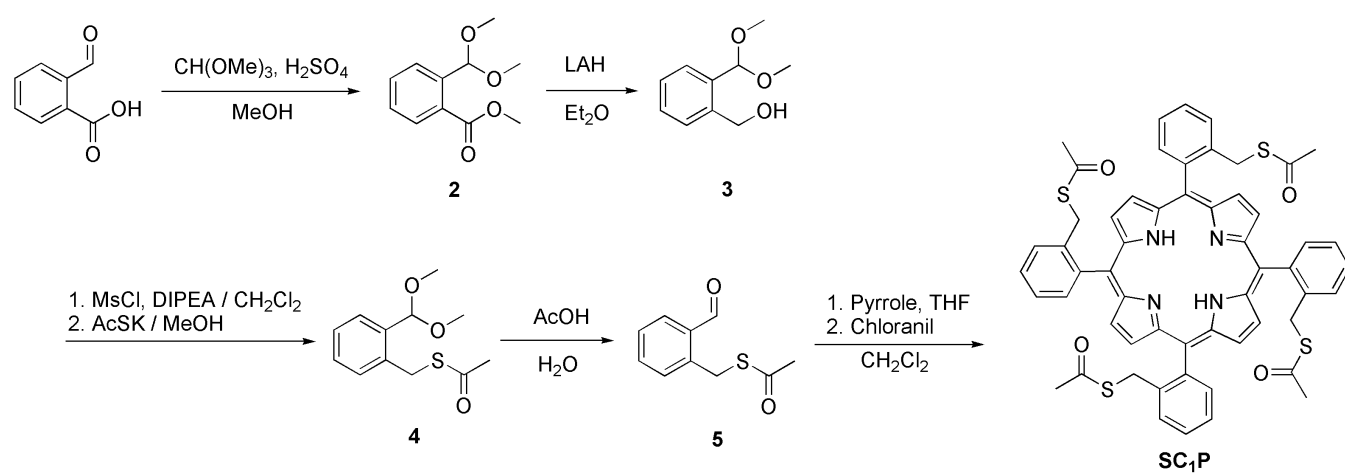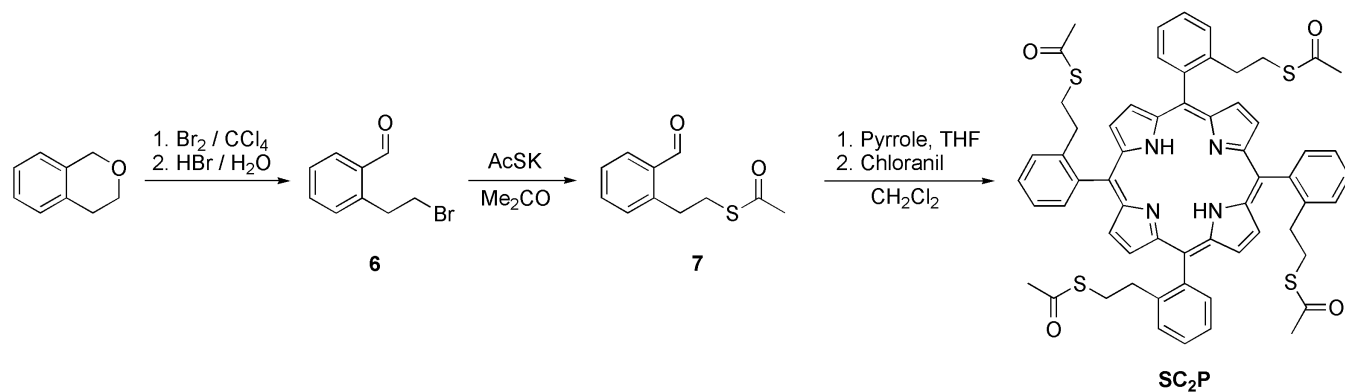

## 2-Acetylthiobenzaldehyde (**1**)

Na<sub>2</sub>S·9H<sub>2</sub>O (15.6 g, 65.0 mmol) in *N,N*-dimethylacetamide (DMAc, 500 mL) was stirred at 90 °C for 20 min. 2-Bromobenzaldehyde (6.25 mL, 53.5 mmol) was added to the solution and it was continuously stirred at 90 °C for 30 min. Acetic anhydride (7.62 mL, 81.1 mmol) was added while cooling in an ice-water bath and the mixture was stirred for 12 min to obtain a yellow solution. Saturated NaHCO<sub>3</sub>(aq) was added to the solution and stirred for 10 min. The product was extracted with dichloromethane (DCM), dried with Na<sub>2</sub>SO<sub>4</sub>, and concentrated under reduced pressure. The product was dissolved in hexane and washed with water several times to remove the DMAc. The solution was dried with Na<sub>2</sub>SO<sub>4</sub> and concentrated under reduced pressure. Purification by column chromatography (silica gel, hexane: ethyl acetate = 9:1) afforded **1** (4.96 g, 51%) as a pale yellow oil.

<sup>1</sup>H NMR (200 MHz, CDCl<sub>3</sub>, 298 K, TMS): δ=10.2 (s, 1H), 7.99 (d, *J*=8.0 Hz, 1H), 7.48-7.53 (m, 3H), 2.48 (s, 3H). MS (EI): *m/z* (%): 180 (6) (M<sup>+</sup>), 137 (100), 138 (89), 109 (58), 104 (36).

## Tetrakis-5α,10α,15α,20α-(2-acetylthiophenyl)porphyrin (SC<sub>0</sub>P)

Trifluoroacetic acid (3.06 mL, 40.0 mmol) was added to the DCM solution (2 L) of **1** (3.60 g, 20.0 mmol) and pyrrole (1.39 mL, 20.0 mmol) under a N<sub>2</sub> atmosphere. After stirring for 1 h at room temperature (RT), chloranil (3.44 g, 14.0 mmol) was added and the mixture was refluxed for 20 min. After cooling to RT, NaHCO<sub>3</sub>(aq) was added to terminate the reaction. The DCM phase was extracted, washed with water, filtered through Celite, and concentrated under reduced pressure. Purification by column chromatography (silica gel, DCM) afforded SC<sub>0</sub>P (82.3 mg, 1.8%) as a purple solid.

<sup>1</sup>H NMR (600 MHz, CDCl<sub>3</sub>, 298 K, TMS): δ=8.57 (d, *J*=15 Hz, 4H), 8.17 (dd, *J*=7.2 Hz, *J*=1.2 Hz, 2H), 7.90 (dd, *J*=8.4 Hz, *J*=1.5 Hz, 2H), 7.86 (ddd, *J*=7.8 Hz, *J*=7.8 Hz, *J*=1.8 Hz, 2H), 7.76 (ddd, *J*=7.8 Hz, *J*=7.2 Hz, *J*=1.8 Hz, 2H), 1.69 (s, 6H), -2.69 (d, *J*=6 Hz, 1H). <sup>13</sup>C NMR (600 MHz, CDCl<sub>3</sub>, 298 K, TMS): δ=192.8, 145.2, 135.7, 134.9, 131.7, 130.7 (br), 129.3, 127.8, 118.0, 29.8. MS (MALDI): *m/z* (%): 911.2 (M<sup>+</sup>). Calculated mass 911.18.

## 2-Dimethoxymethyl methyl benzoate (2)

Sulfuric acid (405  $\mu$ L, 7.60 mmol) was added to the dehydrated methanol solution (200 mL) of terephthalaldehydic acid (76.1 g, 507 mmol) and trimethyl orthoformate (150 mL, 1.37 mol) under a N<sub>2</sub> atmosphere, and then the mixture was refluxed for 1 day. The reaction was terminated by adding NaHCO<sub>3</sub>(aq). The product was extracted with DCM, dried with Na<sub>2</sub>SO<sub>4</sub>, and concentrated under reduced pressure to obtain **2** (106 g, 99%) as a colorless oil.

<sup>1</sup>H NMR (200 MHz, CDCl<sub>3</sub>):  $\delta$ =7.80 (m, 1H), 7.42 (m, 3H), 6.07 (s, 1H), 3.91 (s, 3H), 3.38 (s, 6H). MS (EI): *m/z* (%): 109 (100), 165 (53), 80 (32), 110 (22), 81 (10).

## 2-Hydroxymethyl benzaldehyde dimethylacetal (3)

Lithium aluminum hydride (19.1 g, 504 mmol) was dissolved in dehydrated diethyl ether (400 mL) under a N<sub>2</sub> atmosphere. **2** (106 g, 504 mmol) was added dropwise while cooling in an ice-water bath and the mixture was refluxed for 4 h. After cooling in an ice-water bath, 20 mL water, 4 M NaOH(aq) (20 mL) and 60 mL water were, in turn, added dropwise. The mixture was stirred for 30 min at RT. The resulting precipitate was filtered through Celite and the filtrate was extracted with diethyl ether. The diethyl ether solution was washed with water, dried with Na<sub>2</sub>SO<sub>4</sub>, and concentrated under reduced pressure to obtain **3** (78.7 g, 79%) as a colorless oil.

<sup>1</sup>H NMR (200 MHz, CDCl<sub>3</sub>):  $\delta$ =7.49-7.55 (m, 1H), 7.30-7.41 (m, 3H), 5.51 (s, 1H), 4.71 (d, *J*=6.6 Hz, 2H), 3.37 (s, 6H), 3.19 (t, *J*=6.6 Hz, 1H). MS (EI): *m/z* (%): 119 (100), 91 (79), 149 (26), 89 (14).

## 2-Acetylthiomethyl benzaldehyde dimethylacetal (4)

Methanesulfonyl chloride (39.2 mL, 506 mmol) was added dropwise under a N<sub>2</sub> atmosphere to the dehydrated DCM solution (200 mL) of *N,N'*-diisopropylethylamine (90.0 mL, 506 mmol) and **3** (78.7 g, 397 mmol) while cooling in an ice-water bath. The mixture was stirred at 0 °C for 2 h and then continuously at RT for 1 h. The mixture was washed with water, dried with Na<sub>2</sub>SO<sub>4</sub>, and concentrated under reduced pressure to obtain a yellow oil. Potassium thioacetate (48.2 g, 422 mmol) was slowly

added to the methanol solution to dissolve the obtained yellow oil while cooling in an ice-water bath, and then the mixture was stirred at RT for 3 h. The product was extracted with DCM, washed with water, dried with Na<sub>2</sub>SO<sub>4</sub> and concentrated under reduced pressure to obtain **4** (98.0 g, 96%) as a yellow oil.

<sup>1</sup>H NMR (200 MHz, CDCl<sub>3</sub>):  $\delta$ =7.47-7.54 (m, 1H), 7.20-7.40 (m, 3H), 5.47 (s, 1H), 4.28 (s, 2H), 3.33 (s, 6H), 2.34 (s, 3H). MS (EI): *m/z* (%): 135 (100), 165 (89), 134 (61), 91 (40), 119 (24), 105 (26).

## **2-Acetylthiomethylbenzaldehyde (5)**

Acetic acid (150 mL) was added to the aqueous solution (80 mL) of **4** (98.0 g, 382 mmol) and then the mixture was stirred at RT for 2 h. NaHCO<sub>3</sub>(aq) was added to terminate the reaction. The product was extracted with DCM, dried with Na<sub>2</sub>SO<sub>4</sub>, and concentrated under reduced pressure. Purification by column chromatography (silica gel, hexane: ethyl acetate = 4:1) afforded **5** (72.1 g, 97%) as a yellow oil.

<sup>1</sup>H NMR (200 MHz, CDCl<sub>3</sub>):  $\delta$ =10.2 (s, 1H), 7.82-7.87 (m, 1H), 7.42-7.60 (m, 3H), 4.55 (s, 2H), 2.35 (s, 3H). MS (EI): *m/z* (%): 151 (100), 134 (75), 91 (69), 118 (53), 90 (41).

## **Tetrakis-5 $\alpha$ ,10 $\alpha$ ,15 $\alpha$ ,20 $\alpha$ -(2-acetylthiometylphenyl)porphyrin (SC<sub>1</sub>P)**

Trifluoroacetic acid (3.06 mL, 40.0 mmol) was added to the DCM solution (2 L) of **5** (3.89 g, 20.0 mmol) and pyrrole (1.39 mL, 20.0 mmol) under a N<sub>2</sub> atmosphere. After stirring for 1 h at RT, chloranil (3.44 g, 14.0 mmol) was added and then the mixture was refluxed for 20 min. After cooling to RT, NaHCO<sub>3</sub>(aq) was added to terminate the reaction. The DCM phase was extracted, washed with water, filtered through Celite, and concentrated under reduced pressure. Purification by column chromatography (silica gel, DCM) afforded SC<sub>1</sub>P (105 mg, 2%) as a purple solid.

<sup>1</sup>H NMR (200 MHz, CDCl<sub>3</sub>):  $\delta$ =8.64 (s, 4H), 7.99 (dd, *J*=7.8 Hz, *J*=1.2 Hz, 2H), 7.70-7.86 (m, 4H), 7.59 (dt, *J*=7.2 Hz, *J*=1.6 Hz, 2H), 3.92 (s, 4H), 2.02 (s, 6H), -2.67 (s, 1H). MS (ESI): *m/z*: 967.2 (M+H<sup>+</sup>).

## **2- (2-Bromoethyl)benzaldehyde (6)**

Isochroman (25.0 g, 186 mmol) was added to tetrachloromethane (100 mL) under a N<sub>2</sub> atmosphere

and the solution was cooled in an ice-water bath. Bromine (30.0 g, 188 mmol) was added dropwise to the solution and the solution was refluxed for 90 min. The solution was cooled and concentrated under reduced pressure to obtain a yellow oil. Hydrobromic acid (56.8 g, 330 mmol) was added to the obtained yellow oil and the solution was refluxed for 20 min under a N<sub>2</sub> atmosphere. After cooling to room temperature the reaction was terminated by adding NaHCO<sub>3</sub>(aq). The product was extracted with DCM, washed with water, dried with Na<sub>2</sub>SO<sub>4</sub>, and concentrated under reduced pressure. Purification by column chromatography (silica gel, hexane: ethylacetate = 3:1) afforded **6** (31.3g, 78%).

<sup>1</sup>H NMR (200 MHz, CDCl<sub>3</sub>): δ=10.1 (s, 1H), 7.31-7.84 (m, 4H), 3.56-3.64 (m, 4H). MS (EI): *m/z* (%): 133 (100), 105 (17), 91 (14), 103 (12), 134 (10).

### **2-Acethylthioethylbenzaldehyde (7)**

Potassium thioacetate (16.8 g, 147 mmol) was slowly added to the acetone solution of **6** (31.3 g, 147 mmol) while cooling in an ice-water bath and the mixture was stirred at RT for 3 h. The product was extracted with DCM, washed with water, dried with Na<sub>2</sub>SO<sub>4</sub>, and concentrated under reduced pressure to afford **7** (27.9 g, 91%).

<sup>1</sup>H NMR (200 MHz, CDCl<sub>3</sub>): δ=10.2 (s, 1H), 7.34-7.81 (m, 4H), 3.10-3.29 (m, 4H), 2.32 (s, 3H). MS (EI): *m/z* (%): 132 (100), 133 (94), 148 (84), 147 (59), 91 (47), 119 (42), 104 (38), 149 (30), 115 (29), 103 (28).

### **Tetrakis-5 $\alpha$ ,10 $\alpha$ ,15 $\alpha$ ,20 $\alpha$ -(2-acetylthioethylphenyl)porphyrin (SC<sub>2</sub>P)**

Trifluoroacetic acid (3.06 mL, 40.0 mmol) was added to a DCM solution (2 L) of **7** (4.17 g, 20.0 mmol) and pyrrole (1.39 mL, 20.0 mmol) under a N<sub>2</sub> atmosphere. After stirring for 1 h at RT, chloranil (3.44 g, 14.0 mmol) was added and the mixture was refluxed for 20 min. After cooling to RT, NaHCO<sub>3</sub>(aq) was added to terminate the reaction. The DCM phase was extracted, washed with water, filtered through Celite, and concentrated under reduced pressure. Purification by column chromatography (silica gel, DCM) afforded SC<sub>2</sub>P (104 mg, 2%) as a purple solid.



$^1\text{H}$  NMR (200 MHz,  $\text{CDCl}_3$ ):  $\delta$ =8.66 (s, 4H), 7.95 (dd,  $J$ =7.8 Hz,  $J$ =1.2 Hz, 2H), 7.75-7.78 (m, 4H), 7.55 (dt,  $J$ =7.2 Hz,  $J$ =1.6 Hz, 2H), 2.71 (m, 8H), 2.02 (s, 6H), -2.69 (s, 1H).

**Synthesis of  $\text{SC}_0\text{P-AuCs}$ :**  $\text{HAuCl}_4 \cdot 4\text{H}_2\text{O}$  (20.6 mg, 50  $\mu\text{mol}$ ) was dissolved in 10 mL of Nanopure water and tetraoctylammonium bromide (30.1 mg, 55  $\mu\text{mol}$ ) in 50 mL of DCM, and these were mixed in a 200 mL conical flask. The solution was stirred vigorously with a magnetic stir bar to facilitate the phase transfer of the  $\text{Au}^{\text{III}}$  salt into the DCM phase. After approximately 15 min, phase transfer was complete and the clear aqueous phase was removed.  $\text{SC}_0\text{P}$  (9.1 mg, 10  $\mu\text{mol}$ ) in DCM (5 mL) and methanol (50 mL) was added to the DCM solution of  $\text{Au}^{\text{III}}$ . The mixed solution was cooled to  $-98\text{ }^\circ\text{C}$  in a bath containing methanol and liquid  $\text{N}_2$ . On reaching  $-98\text{ }^\circ\text{C}$ , a methanol solution of  $\text{NaBH}_4$  (18.9 mg, 500  $\mu\text{mol}$ ) was quickly added to the solution. The reaction was allowed to proceed for 15 min. After 200 mL Nanopure water was added to remove byproducts and methanol, the solution was slowly stirred for 20 min. The DCM phase was collected and dried by  $\text{Na}_2\text{SO}_4$ . After 3 mL  $N,N$ -dimethylformamide (DMF) was added, the only DCM was evaporated under reduced pressure. The obtained  $\text{SC}_0\text{P-AuCs}$  in DMF was purified by GPC-HPLC. The purified  $\text{SC}_0\text{P-AuCs}$  was stored in DMF.

**Synthesis of  $\text{SC}_1\text{P-}$  and  $\text{SC}_2\text{P-AuCs}$ :**  $\text{SC}_1\text{P-}$  and  $\text{SC}_2\text{P-AuCs}$  were synthesized as previously reported.<sup>3</sup>  $\text{HAuCl}_4 \cdot 4\text{H}_2\text{O}$  (3.2  $\mu\text{mol}$ ) was dissolved in 1 mL of Nanopure water and tetraoctylammonium bromide (3.5  $\mu\text{mol}$ ) was dissolved in 1 mL of DCM, and these were mixed in a glass vial. The solution was stirred vigorously with a magnetic stir bar to facilitate the phase transfer of the  $\text{Au}^{\text{III}}$  salt into the DCM phase. After approximately 15 min, phase transfer was complete and the clear aqueous phase was removed.  $\text{SC}_n\text{P}$  ( $n = 1$  and 2) (1.6  $\mu\text{mol}$ ) in DCM (1 mL) and methanol (3 mL) was added to the DCM solution of  $\text{Au}^{\text{III}}$ . The mixed solution was cooled to  $-98\text{ }^\circ\text{C}$  in a bath containing methanol and liquid  $\text{N}_2$  over 30 min with magnetic stirring. On reaching  $-98\text{ }^\circ\text{C}$ , a methanol solution of  $\text{NaBH}_4$  (32  $\mu\text{mol}$ , 10 equiv. of the moles of Au) was quickly added to the solution. The reaction was allowed to proceed for 4 h. A brown powder precipitated in the vial and was collected by filtration. The brown powder was extracted with

DCM. The obtained  $SC_nP$ -AuCs were dispersed in DMF and purified by gel permeation chromatography (JAIGEL-W253). The purified  $SC_nP$ -AuCs was stored in DMF.

### **Computational method**

All the density functional theory calculations were performed with a plane wave basis set and ultrasoft pseudopotentials<sup>5</sup> as implemented in the STATE<sup>6</sup> code. The Perdew-Ernzerhof-Burke<sup>7</sup> generalized gradient approximation was used for the exchange correlation functional. The plane wave cutoffs for the wave functions and the augmentation charge were 25 and 225 Ry, respectively, and the  $\Gamma$ -point was used to sample the Brillouin zone. A  $SC_0P$  molecule was placed in a repeat tetragonal unit cell with edges of  $2.117 \times 2.117 \times 1.323$  nm. During the structural optimization the atoms were allowed to relax until the forces acting on them were less than 0.8 nN.

## GPC chromatogram of $SC_nP$ -AuCs

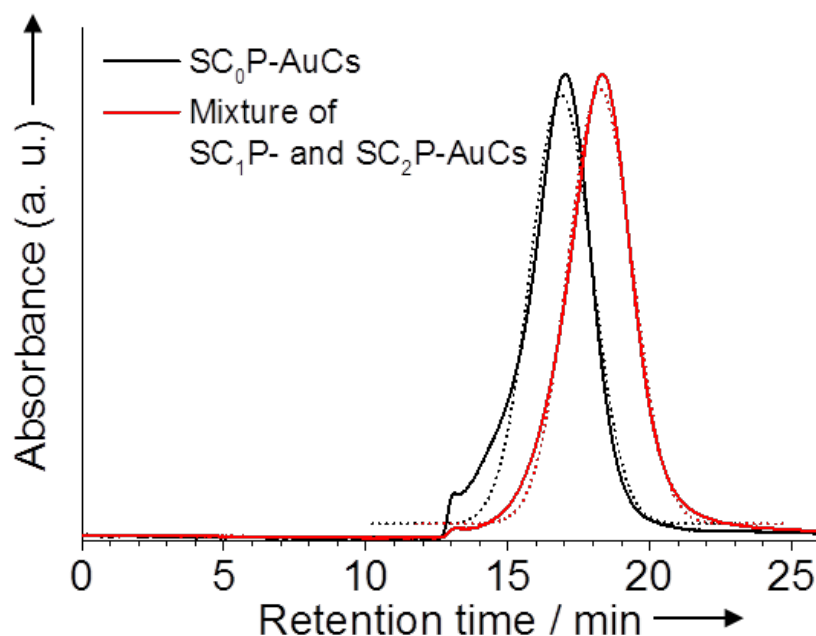

**Figure S1.** GPC chromatograms of  $SC_0P$ -AuCs and a mixture of  $SC_1P$ - and  $SC_2P$ -AuCs. Solid lines: experimental data. Broken lines: Gauss fitting.

Figure S1 shows GPC chromatograms of  $SC_0P$ -AuCs and a mixture of  $SC_1P$ - and  $SC_2P$ -AuCs. The retention times of  $SC_1P$ - and  $SC_2P$ -AuCs were similar. Conversely,  $SC_0P$ -AuCs showed a peak at 17.0 min, which is 1.3 min faster than the peak of the mixture (18.3 min), indicating that the  $SC_0P$ -AuCs has a larger volume than  $SC_1P$ - or  $SC_2P$ -AuCs. The peak shapes of the  $SC_nP$ -AuCs showed a Gaussian distribution, indicating that the  $SC_nP$ -AuCs consist of single components.

## Decay profiles for free SC<sub>0</sub>P and SC<sub>0</sub>P–AuCs

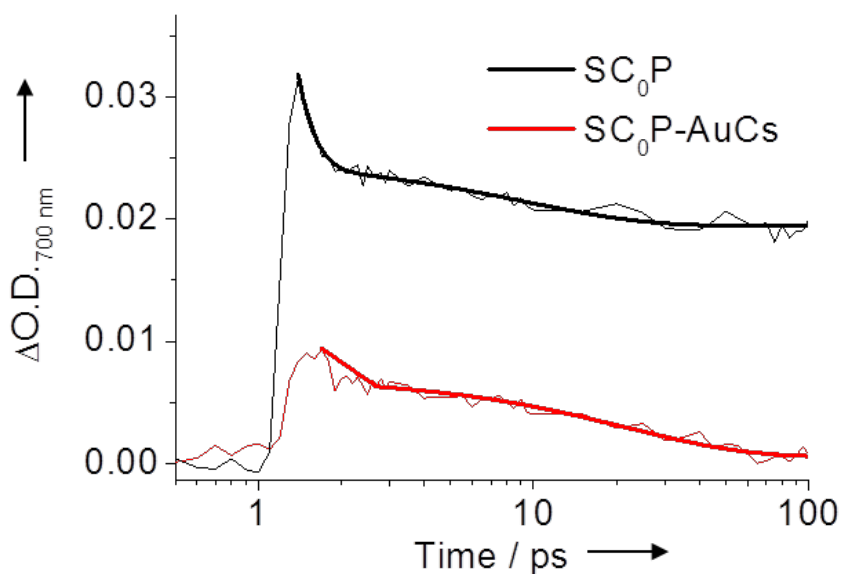

**Figure S2.** Decay profiles of free SC<sub>0</sub>P and SC<sub>0</sub>P–AuCs in DMF at 700 nm after laser excitation at 520 nm.

Decay profiles of excited free SC<sub>0</sub>P and SC<sub>0</sub>P–AuCs at 700 nm were fitted by a double exponential decay function. The decay profile of free SC<sub>0</sub>P showed a fast decay component ( $< 300$  fs) and this is assigned to a vibrational relaxation from the vibrational-excited state, and a long-lived component, which is assigned to the deactivation of the S<sub>1</sub> state. Conversely, the decay profile for SC<sub>0</sub>P–AuCs exhibited a fast and slow component, estimated to be 700 fs and 32 ps, respectively. The fast and slow components likely correspond to the formation of an exciplex and charge separation, respectively.

## References

- [1] K. Sunahara, A. Furube, R. Katoh, S. Mori, M. J. Griffith, G. G. Wallace, P. Wagner, D. L. Officer and A. J. Mozer, *J. Phys. Chem. C*, 2011, **115**, 22084.
- [2] S. Mahanta, A. Furube, H. Matsuzaki, T. N. Murakami and H. Matsumoto, *J. Phys. Chem. C*, 2012, **116**, 20213.
- [3] M. Sakamoto, D. Tanaka, H. Tsunoyama, T. Tsukuda, Y. Minagawa, Y. Majima and T. Teranishi, *J. Am. Chem. Soc.*, 2012, **134**, 816.
- [4] M. Kanehara, H. Takahashi and T. Teranishi, *Angew. Chem. Int. Ed.*, 2008, **47**, 307.
- [5] D. Vanderbilt, *Phys. Rev. B*, 1990, **41**, 7892.
- [6] Y. Morikawa, H. Ishii and K. Seki, *Phys. Rev. B*, 2004, **69**, 041403.
- [7] J. P. Perdew, K. Burke and M. Ernzerhof, *Phys. Rev. Lett.*, 1996, **77**, 3865.

## Complete reference in the main text

- [1] M. L. Perrin, F. Prins, C. A. Martin, A. J. Shaikh, R. Eelkema, J. H. van Esch, T. Briza, R. Kaplaneck, V. Kral, J. M. van Ruitenbeek, H. S. J. van der Zant and D. Dulić, *Angew. Chem. Int. Ed.*, 2011, **50**, 11223.
- [6] G. Heimel, S. Duhm, I. Salzmann, A. Gerlach, A. Strozecka, J. Niederhausen, C. Bürker, T. Hosokai, I. Fernandez-Torrente, G. Schulze, S. Winkler, A. Wilke, R. Schlesinger, J. Frisch, B. Bröker, A. Vollmer, B. Detlefs, J. Pflaum, S. Kera, K. J. Franke, N. Ueno, J. I. Pascual, F. Schreiber and N. Koch, *Nat. Chem.*, 2013, **5**, 187.
